# Supplementary material
Source: PubMed Central journal article supplement (PMC6090362)
Supplement: tpmd180097.SD1.pdf [file tpmd180097.SD1.pdf]

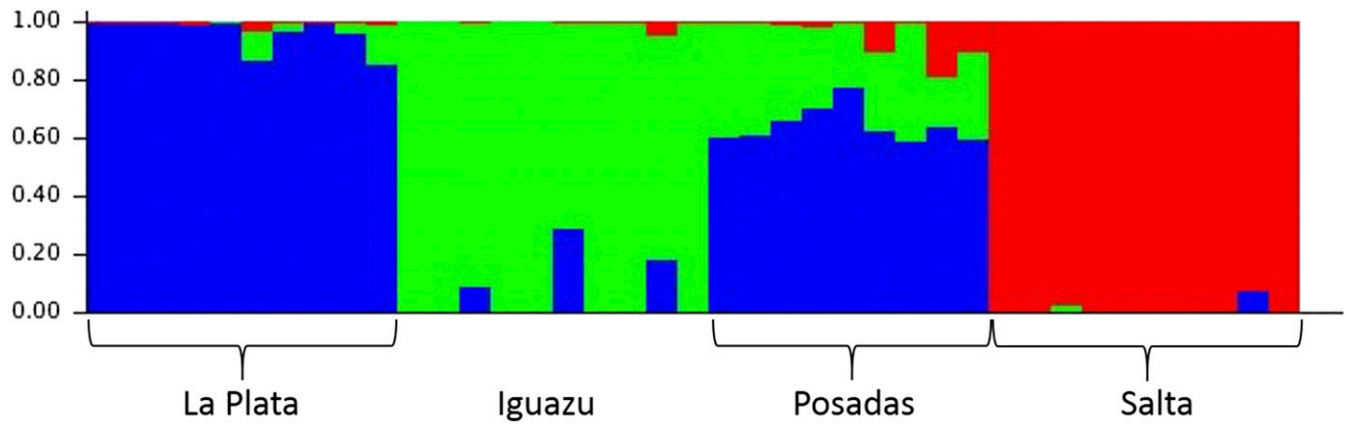

SUPPLEMENTAL FIGURE 1. Genetic structure of Argentine *Aedes aegypti* populations used in this study. Each vertical bar represents one of 39 individual mosquitoes genotyped at 6,276 single nucleotide polymorphic sites. The colors refer to predicted ancestry from one of three distinct genetic clusters among the four populations ( $k = 3$ ).

SUPPLEMENTAL TABLE 1

Temperature regimes used for experimental holding of *Aedes aegypti* for individual populations and control (mean)

| Hour   | Salta | Iguazu | Posadas | La Plata | Mean |
|--------|-------|--------|---------|----------|------|
| 0:00   | 21    | 21     | 21      | 18       | 20   |
| 1:00   | 21    | 21     | 21      | 18       | 20   |
| 2:00   | 21    | 21     | 19      | 18       | 20   |
| 3:00   | 21    | 20     | 19      | 18       | 20   |
| 4:00   | 21    | 20     | 19      | 18       | 20   |
| 5:00   | 20    | 20     | 18      | 18       | 19   |
| 6:00   | 20    | 20     | 18      | 18       | 19   |
| 7:00   | 21    | 20     | 18      | 18       | 19   |
| 8:00   | 23    | 24     | 20      | 18       | 21   |
| 9:00   | 27    | 26     | 23      | 20       | 24   |
| 10:00  | 29    | 28     | 26      | 20       | 26   |
| 11:00  | 31    | 30     | 29      | 22       | 28   |
| 12:00  | 31    | 30     | 30      | 22       | 28   |
| 13:00  | 31    | 33     | 31      | 23       | 30   |
| 14:00  | 29    | 33     | 33      | 23       | 30   |
| 15:00  | 28    | 34     | 34      | 23       | 30   |
| 16:00  | 28    | 34     | 34      | 22       | 30   |
| 17:00  | 26    | 35     | 33      | 22       | 29   |
| 18:00  | 25    | 33     | 32      | 21       | 28   |
| 19:00  | 25    | 29     | 29      | 21       | 26   |
| 20:00  | 24    | 25     | 26      | 20       | 24   |
| 21:00  | 24    | 25     | 26      | 20       | 24   |
| 22:00  | 24    | 22     | 25      | 20       | 23   |
| 23:00  | 24    | 21     | 25      | 20       | 23   |
| Mean   | 24.8  | 26.0   | 25.4    | 20.0     | 24.2 |
| Median | 24.0  | 25.0   | 25.5    | 20.0     | 24.0 |
